# Supplementary material for: Suv4-20h Histone Methyltransferases Promote Neuroectodermal Differentiation by Silencing the Pluripotency-Associated Oct-25 Gene
Source: PubMed Central journal article supplement (PMC3561085; doi:10.1371/journal.pgen.1003188), 2013-01-31
Supplement: pgen.1003188.s001.pdf [file pgen.1003188.s001.pdf]

A

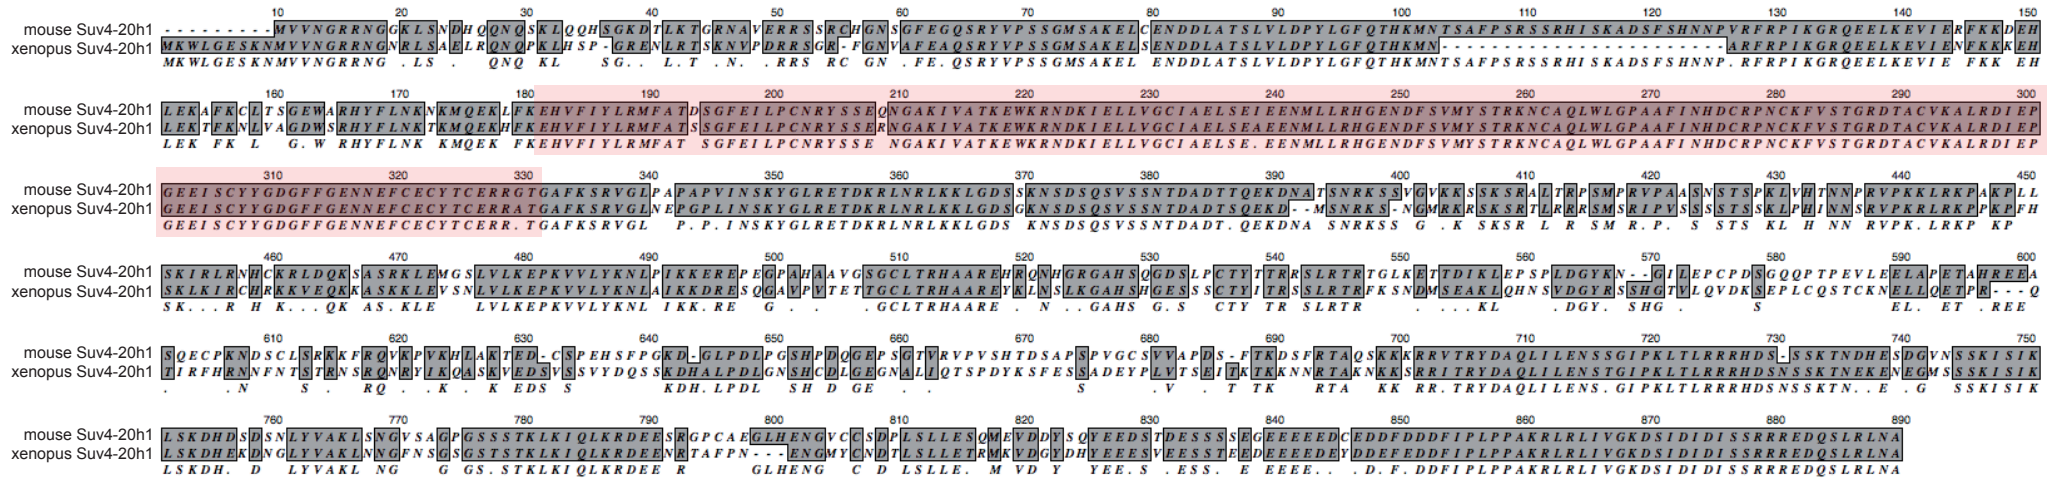

B

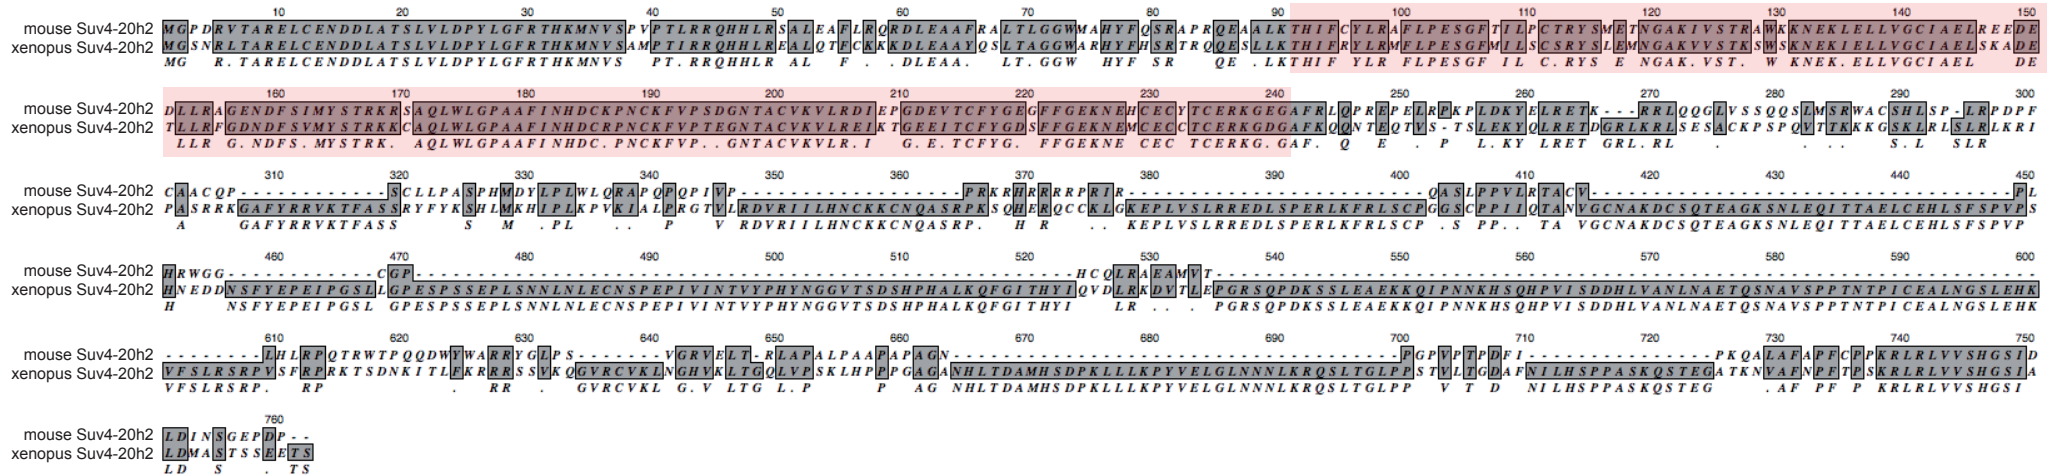

C

|            | xSuv4-20h1 | xSuv4-20h2 | mSuv4-20h1 | mSuv4-20h2 |
|------------|------------|------------|------------|------------|
| xSuv4-20h1 | -          | 83%        | 98%        | 81%        |
| xSuv4-20h2 | 83%        | -          | 83%        | 88%        |
| mSuv4-20h1 | 98%        | 83%        | -          | 75%        |
