# Supplementary material for: Suv4-20h Histone Methyltransferases Promote Neuroectodermal Differentiation by Silencing the Pluripotency-Associated Oct-25 Gene
Source: PubMed Central journal article supplement (PMC3561085; doi:10.1371/journal.pgen.1003188), 2013-01-31

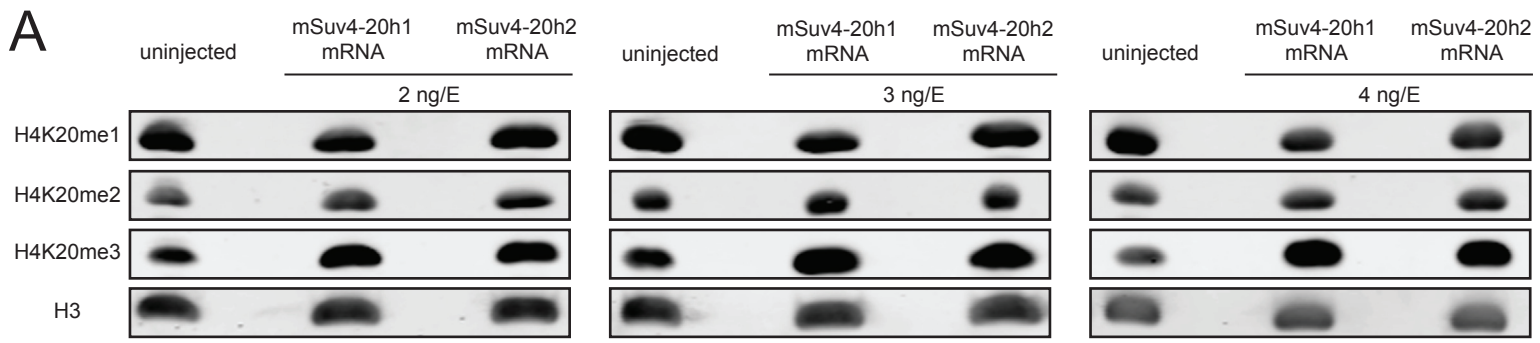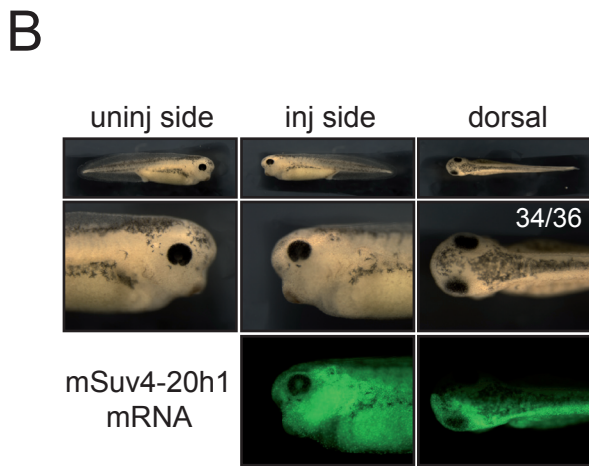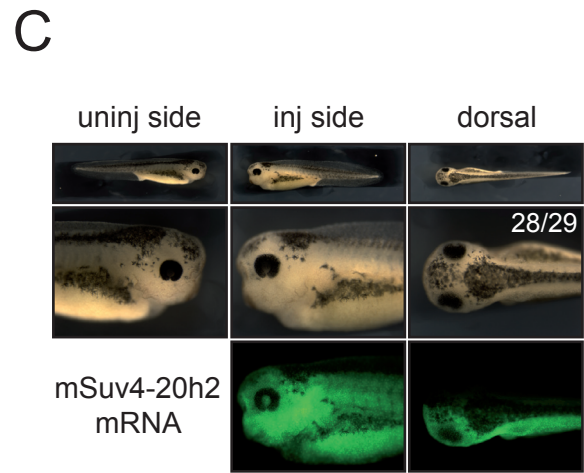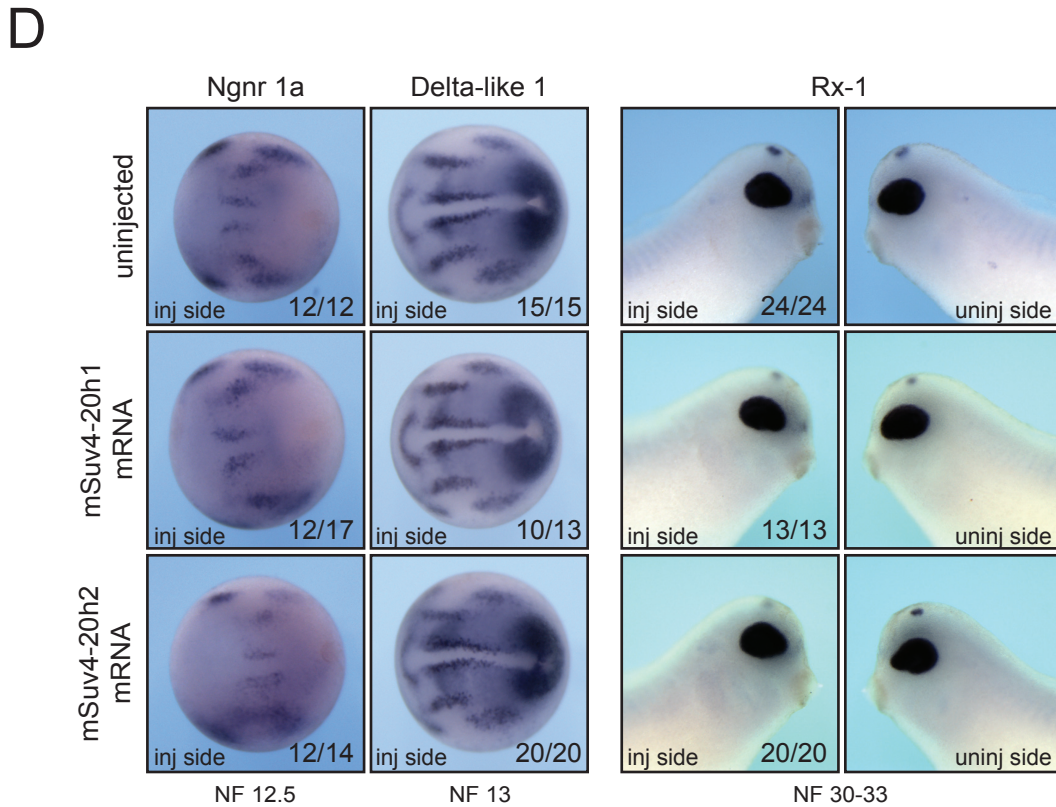

Supplement: pgen.1003188.s009.pdf [file pgen.1003188.s009.pdf]
