# Supplementary material for: Suv4-20h Histone Methyltransferases Promote Neuroectodermal Differentiation by Silencing the Pluripotency-Associated Oct-25 Gene
Source: PubMed Central journal article supplement (PMC3561085; doi:10.1371/journal.pgen.1003188), 2013-01-31
Supplement: pgen.1003188.s012.pdf [file pgen.1003188.s012.pdf]

A

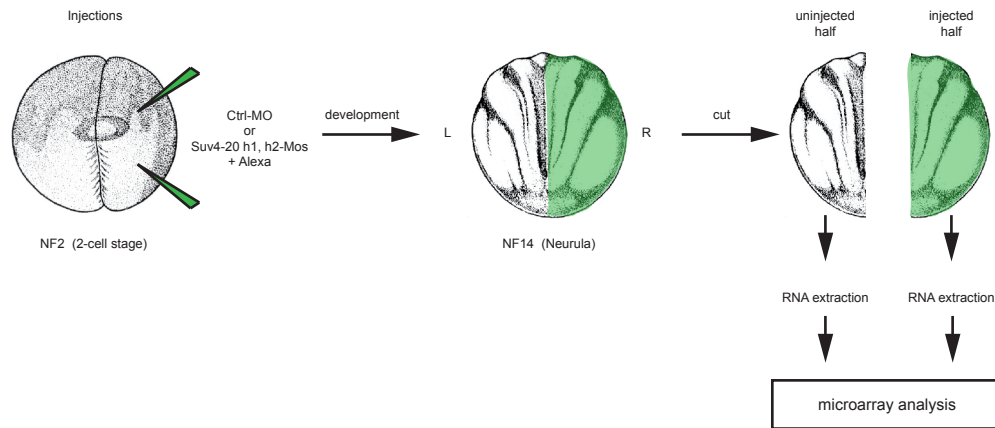

B

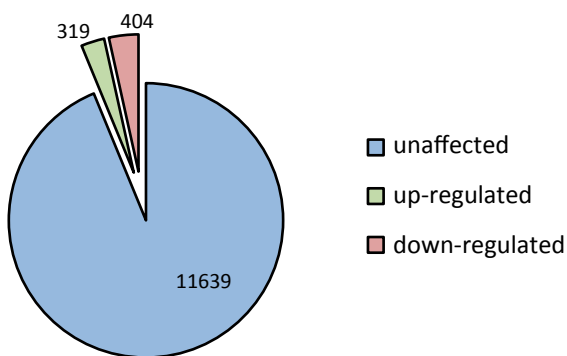

C

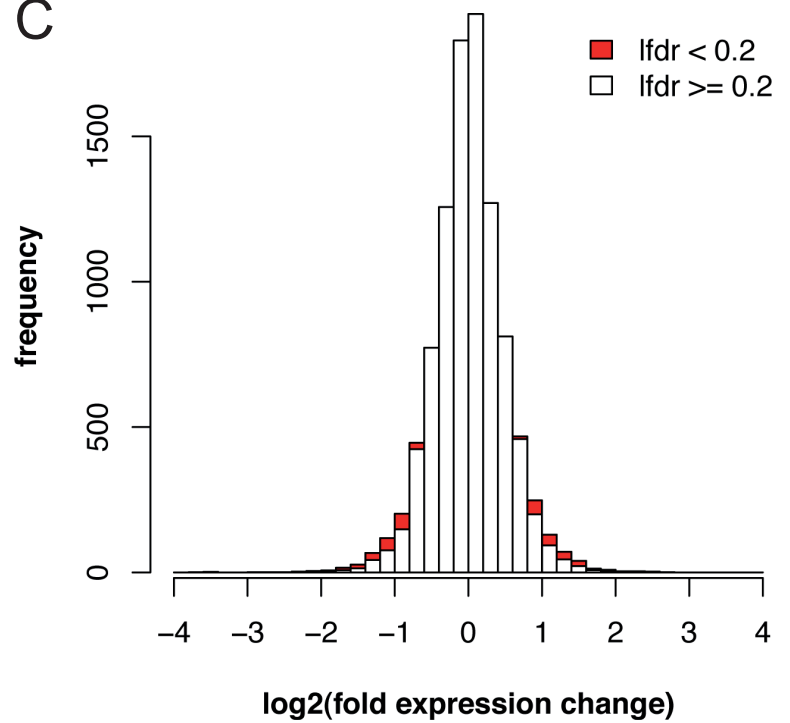

D

| Top 10 Upregulated Genes                     |                 |                |                |
|----------------------------------------------|-----------------|----------------|----------------|
| Gene Name                                    | Gene Symbol     | logFC          | Fold Change    |
| Glucokinase (hexokinase 4)                   | gck             | 2.68077        | 6.41197        |
| Rab interacting lysosomal protein            | rilp            | 2.53108        | 5.78006        |
| Tripartite motif containing 7                | trim7           | 2.41965        | 5.35040        |
| MGC81526 protein                             | MGC81526        | 2.40205        | 5.28555        |
| Fat storage-inducing transmembrane protein 2 | fitm2           | 2.23256        | 4.69967        |
| Teratocarcinoma-derived growth factor 1      | tdgf1           | 2.21938        | 4.65692        |
| CDC42 small effector protein 2-c             | cdc42se2-c      | 2.12568        | 4.36408        |
| cAMP responsive element binding protein 1    | creb1           | 2.09589        | 4.27490        |
| <b>POU class V protein Oct-25</b>            | <b>pou5f1.1</b> | <b>1.97463</b> | <b>3.93028</b> |
| Serine/threonine kinase 35                   | stk35           | 1.96083        | 3.89285        |
