# Supplementary material for: Suv4-20h Histone Methyltransferases Promote Neuroectodermal Differentiation by Silencing the Pluripotency-Associated Oct-25 Gene
Source: PubMed Central journal article supplement (PMC3561085; doi:10.1371/journal.pgen.1003188), 2013-01-31
Supplement: pgen.1003188.s016.pdf [file pgen.1003188.s016.pdf]

## Zic1

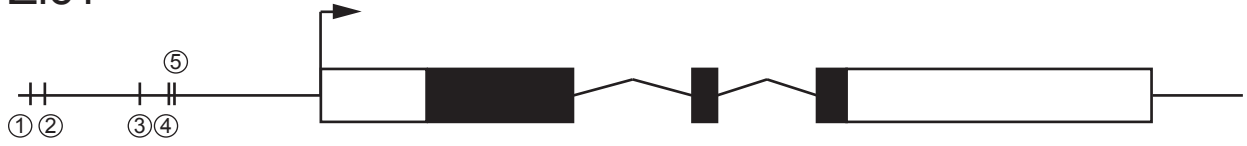

| Zic1  |       |            |        |          |
|-------|-------|------------|--------|----------|
| start | end   | sequence   | weight | position |
| -1918 | -1909 | AATGGAAAAA | 5.2    | ①        |
| -1823 | -1814 | AATGCAACAA | 6.8    | ②        |
| -1195 | -1186 | TATGCAAAAT | 6.6    | ③        |
| -1003 | -994  | AATGCAATGT | 6.7    | ④        |
| -966  | -957  | CATGGAAAAT | 5.3    | ⑤        |

## Zic3

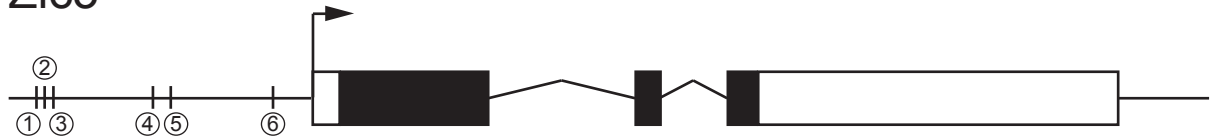

| Zic3  |       |            |        |          |
|-------|-------|------------|--------|----------|
| start | end   | sequence   | weight | position |
| -1816 | -1807 | AATGCAATAC | 6.7    | ①        |
| -1762 | -1753 | GATGCAAAGC | 7.2    | ②        |
| -1704 | -1695 | AATGCAAGCC | 7.5    | ③        |
| -1046 | -1037 | TATGCAAGTC | 6.7    | ④        |
| -928  | -919  | AATGCAAGAT | 6.9    | ⑤        |
| -252  | -243  | GATGCAAAAT | 6.9    | ⑥        |

## Sox2

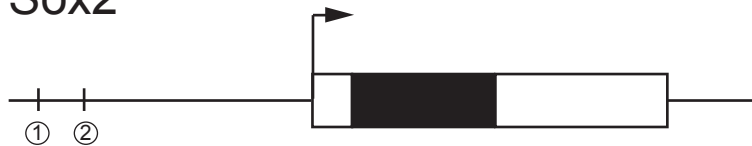

| Sox2  |       |            |        |          |
|-------|-------|------------|--------|----------|
| start | end   | sequence   | weight | position |
| -1803 | -1794 | CATGAAATAA | 5      | ①        |
| -1510 | -1501 | GATGTAAGAG | 5.1    | ②        |
