# Supplementary material for: Suv4-20h Histone Methyltransferases Promote Neuroectodermal Differentiation by Silencing the Pluripotency-Associated Oct-25 Gene
Source: PubMed Central journal article supplement (PMC3561085; doi:10.1371/journal.pgen.1003188), 2013-01-31
Supplement: pgen.1003188.s018.pdf [file pgen.1003188.s018.pdf]

## OLIGONUCLEOTIDES SEQUENCES

### RT-PCR - qRT-PCR (Xenopus)

|                 |                             |
|-----------------|-----------------------------|
| Geminin for     | 5'-tgaagtggctgttgatccag-3'  |
| Geminin rev     | 5'-tcttcgttctctgcaacct-3'   |
| H4 for          | 5'-gaccgcggtcacctacacc-3'   |
| H4 rev          | 5'-ctggcgcttcagaacataca-3'  |
| MyoD for        | 5'-aggaaggccgcccactatga-3'  |
| MyoD rev        | 5'-gttgcgaggatctccactt-3'   |
| Ngnr 1a for     | 5'-acctgcactctgcgcttgat-3'  |
| Ngnr 1a rev     | 5'-gcgcaaggctcatcttgg-3'    |
| Nrp1 for        | 5'-gccatgctgcaaaactctt-3'   |
| Nrp1 rev        | 5'-cccaccttatagccctccat-3'  |
| N-tubulin for   | 5'-tgctgatctacgcaaactgg-3'  |
| N-tubulin rev   | 5'-ctgtcagggctcggtattgt-3'  |
| Oct-25 for      | 5'-caggttccagggttgcag-3'    |
| Oct-25 rev      | 5'-gtccttgagggtgcaggaaag-3' |
| Oct-91 for      | 5'-ggacaacagtcgctgtagca-3'  |
| Oct-91 rev      | 5'-cactgctcagccatcacta-3'   |
| ODC for         | 5'-acaaagaaacccaaaccaga-3'  |
| ODC rev         | 5'-caaacacatccagctcctca-3'  |
| Sox2 for        | 5'-tgcgtccaacaaccagaata-3'  |
| Sox2 rev        | 5'-agttgtgcatctgggggttc-3'  |
| Sox3 for        | 5'-atgaacggctggactaatgg-3'  |
| Sox3 rev        | 5'-tacctgtgctggatctgctg-3'  |
| Sox11 for       | 5'-cgagaaaatccccttcatca-3'  |
| Sox11 rev       | 5'-aggatccacttgggcttttc-3'  |
| Sox17 alpha for | 5'-tactgcaactacccagtcg-3'   |
| Sox17 alpha rev | 5'-agagcccgtccttctcaata-3'  |
| Xiro 1 for      | 5'-ccataaccaccacccttc-3'    |
| Xiro 1 rev      | 5'-tgtctgagtgctgggactg-3'   |
| XK81 for        | 5'-ccgttggtgtgaacaagtg-3'   |
| XK81 rev        | 5'-gcagctcaattccaagctc-3'   |
| xISuv4-20h1 for | 5'-gttggcatgaagtgggttg-3'   |
| xISuv4-20h1 rev | 5'-gcagacaatcggttccatt-3'   |
| xISuv4-20h2 for | 5'-ccgatgttcttccagaga-3'    |
| xISuv4-20h2 rev | 5'-ccaccaggagtcaatctttc-3'  |
| Zic1 for        | 5'-acagatgaggctgggcttc-3'   |
| Zic1 rev        | 5'-cagttggctggaggcataat-3'  |
| Zic2 for        | 5'-tcggtaggacggagcaatac-3'  |
| Zic2 rev        | 5'-tcataggggagtactggttg-3'  |
| Zic3 for        | 5'-ggtggtgcagccttaactc-3'   |

Zic3 rev

5'-tggcaaaaagtccatgttga-3'

### ChIP-qPCR

|                     |                             |
|---------------------|-----------------------------|
| GAPDH for           | 5'-ctgtgctactgggtctttcc-3'  |
| GAPDH rev           | 5'-taagcacaggcagcccttac-3'  |
| Oct-25 5'-UTR for   | 5'-ctccgacttattgggtgga-3'   |
| Oct-25 5'-UTR rev   | 5'-tctaacctggatgggaggtg-3'  |
| Oct-25 exon 1 for   | 5'-agagtccccagaacccaaat-3'  |
| Oct-25 exon 1 rev   | 5'-aagggtaccagtcctatgtg-3'  |
| Oct-25 intron 1 for | 5'-aaagctaccggctgattgg-3'   |
| Oct-25 intron 1 rev | 5'-agcgtgcaggattaggtcat-3'  |
| Oct-25 exon 4 for   | 5'-aggggacgctggaagtac-3'    |
| Oct-25 exon 4 rev   | 5'-ccttggctattgcaccatc-3'   |
| MSAT 3 for          | 5'-ccaccgtttgtcgtagacc-3'   |
| MSAT 3 rev          | 5'-tgctggggcaattaactg-3'    |
| Thibz for           | 5'-gctgtcggaaactctcactcc-3' |
| Thibz rev           | 5'-gcgtctctgtcccagtagc-3'   |
| Thr alpha for       | 5'-attgctttcatgccttgct-3'   |
| Thr alpha rev       | 5'-tatgaaacggagcgacacaa-3'  |

### mutagenesis PCR

|                      |                                                       |
|----------------------|-------------------------------------------------------|
| mSuv4-20h1 Y299A for | 5'-cctggagaagaaatttctgttacgcaggagatggctttttggagaaa-3' |
| mSuv4-20h1 Y299A rev | 5'-tttctcaaaaaagccatctcctgcgtaacaagaaatttcttccagg-3'  |
| mSuv4-20h2 Y217A for | 5'-ggatgaagtgactgcttcgcaggtagggcttctcgg-3'            |
| mSuv4-20h2 Y217A rev | 5'-ccgaagaagccctcacctgcaagcaagtcactcatcc-3'           |
| mSuv4-20h1 N264A for | 5'-ggctcggctcgtcattatagcccatgattgcagacctaactg-3'      |
| mSuv4-20h1 N264A rev | 5'-cagttaggtctgcaatcatgggctataaatgcagcaggaccgagcc-3'  |
| mSuv4-20h2 N182A for | 5'-ggcccagctgccttcatgcccagactgcaaacc-3'               |
| mSuv4-20h2 N182A rev | 5'-gggttgcagtcagggcgatgaaggcagctggcc-3'               |

### qRT-PCR (ES cells)

|                  |                              |
|------------------|------------------------------|
| Actin for        | 5'-ggcatcactattggcaacg-3'    |
| Actin rev        | 5'-tccataccaagaaggaagg-3'    |
| Eomesodermin for | 5'-atcgaccataacccttcgcc-3'   |
| Eomesodermin rev | 5'-cgtaccgacctccagggacaac-3' |
| FoxA2 for        | 5'-gtgaagatggaaggcagcagc-3'  |
| FoxA2 rev        | 5'-gccgcgacatgctcatgta-3'    |
| GAPDH for        | 5'-tcaagaaggtggtgaagcag-3'   |
| GAPDH rev        | 5'-gttgaagtcgaggagacaa-3'    |
| Gata4 for        | 5'-agggtagcctgtatgtaatgc-3'  |
| Gata4 rev        | 5'-attcaggttctgggctcc-3'     |

Sox17 for 5'-acgcaagcggttggcacag-3'

Sox17 rev 5'-cgaagggccgcttctctgc-3'
